# Supplementary material for: Relationships of emerging biomarkers of cancer cachexia with quality of life, appetite, and cachexia
Source: Springer Nature journal article supplement (doi:10.1007/s00520-024-08549-5), 2024-05-14
Supplement: MOESM2 [file 27090492]

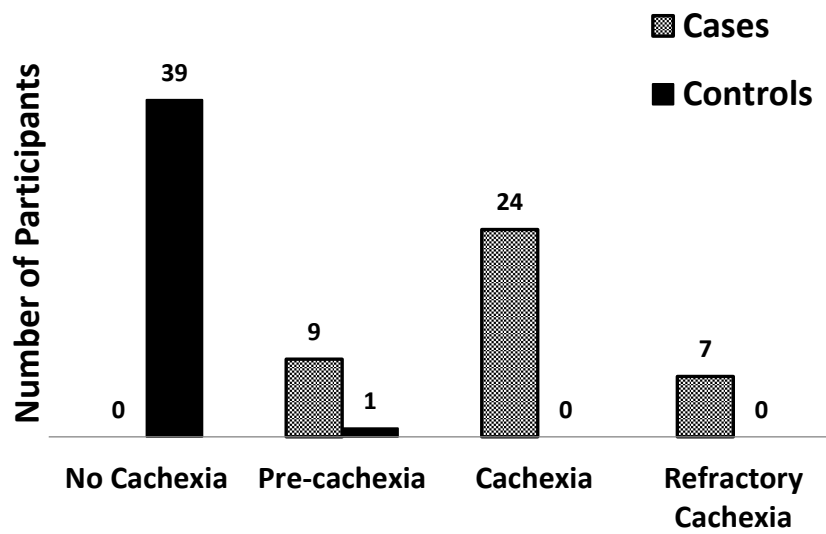

Figure 2: Cachexia categories for cases and controls
