# Supplementary material for: Relationships of emerging biomarkers of cancer cachexia with quality of life, appetite, and cachexia
Source: Springer Nature journal article supplement (doi:10.1007/s00520-024-08549-5), 2024-05-14
Supplement: MOESM3 [file 27090492]

Table 1 (Supplementary) - European organisation for the research and treatment of cancer quality of life–C30 questionnaire (EORTC QLQ-C30) scores

| <b>Category Question</b>           | <b>Cases</b>              | <b>Controls</b>           | <b>Test for Significant difference</b> | <b>Reference Value</b> | <b>p-value for Significance</b> |
|------------------------------------|---------------------------|---------------------------|----------------------------------------|------------------------|---------------------------------|
| <b>Global Health Status (QL-G)</b> | <b>41.04<br/>(±16.81)</b> | <b>83.75<br/>(±19.42)</b> | <b>p &lt; 0.01</b>                     | 61.5                   | <b>p &lt; 0.001</b>             |
| <b>Functional scales (QL-FS)</b>   | <b>57.33<br/>(±20.78)</b> | <b>91.58 (±8.58)</b>      | <b>p &lt; 0.01</b>                     | 74.32                  | <b>p &lt; 0.001</b>             |
| <b>Symptom Scales (QL-SS)</b>      | <b>40.29<br/>(±16.34)</b> | <b>7.68 (±7.40)</b>       | <b>p &lt; 0.01</b>                     | 18.07                  | <b>p = 0.01</b>                 |
